# Supplementary material for: Metabomatching: Using genetic association to identify metabolites in proton NMR spectroscopy
Source: PubMed Central journal article supplement (PMC5711027; doi:10.1371/journal.pcbi.1005839), 2017-12-01
Supplement: pcbi.1005839.s006.pdf [file pcbi.1005839.s006.pdf]

### Metabomatching Settings

mode peak,  $\delta = 0.030$   
 scoring  $\chi^2$   
 database UMDB

### Pseudospectrum of rs10774021 in *SLC6A13*

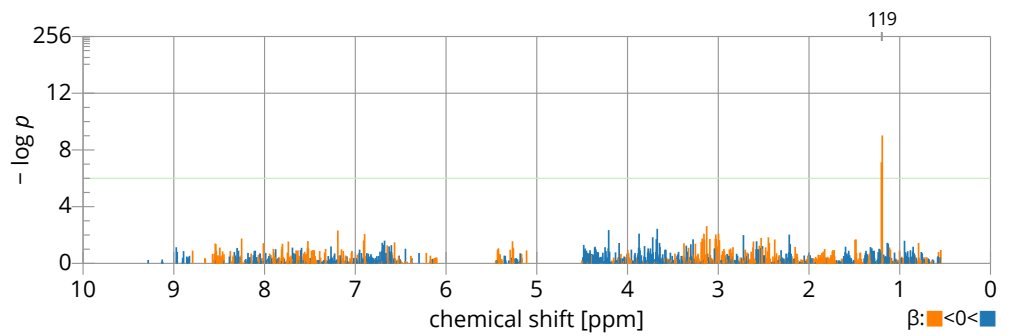

### Candidate Metabolites

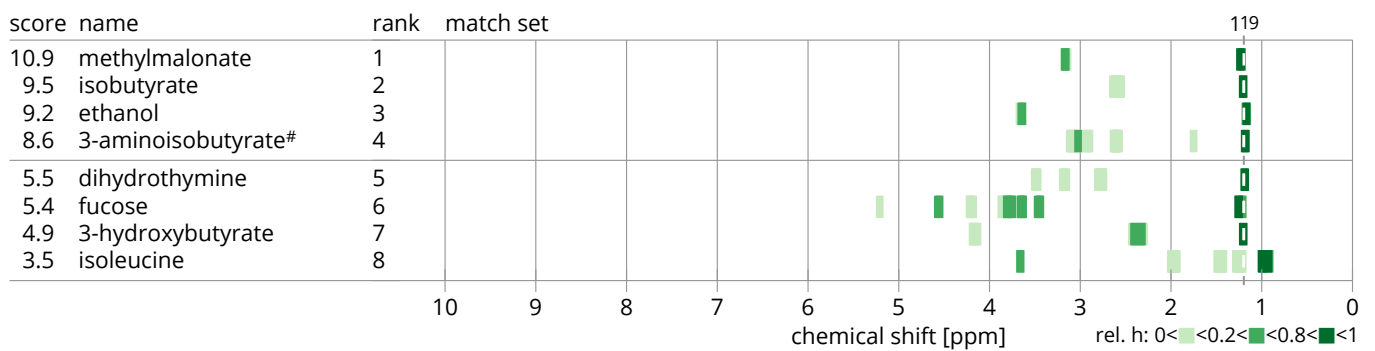

(A)  $\chi^2$ -scoring metabomatching of *SLC6A13* pseudospectrum.

### Metabomatching Settings

mode peak,  $\delta = 0.030$   
 scoring Z  
 database UMDB

### Pseudospectrum of rs10774021 in SLC6A13

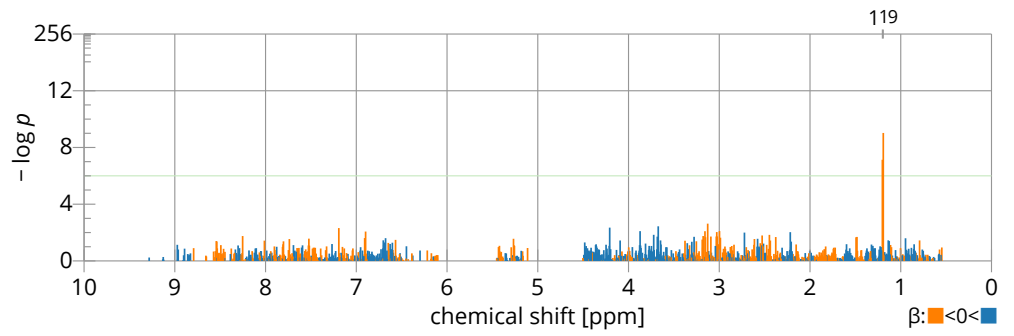

### Candidate Metabolites

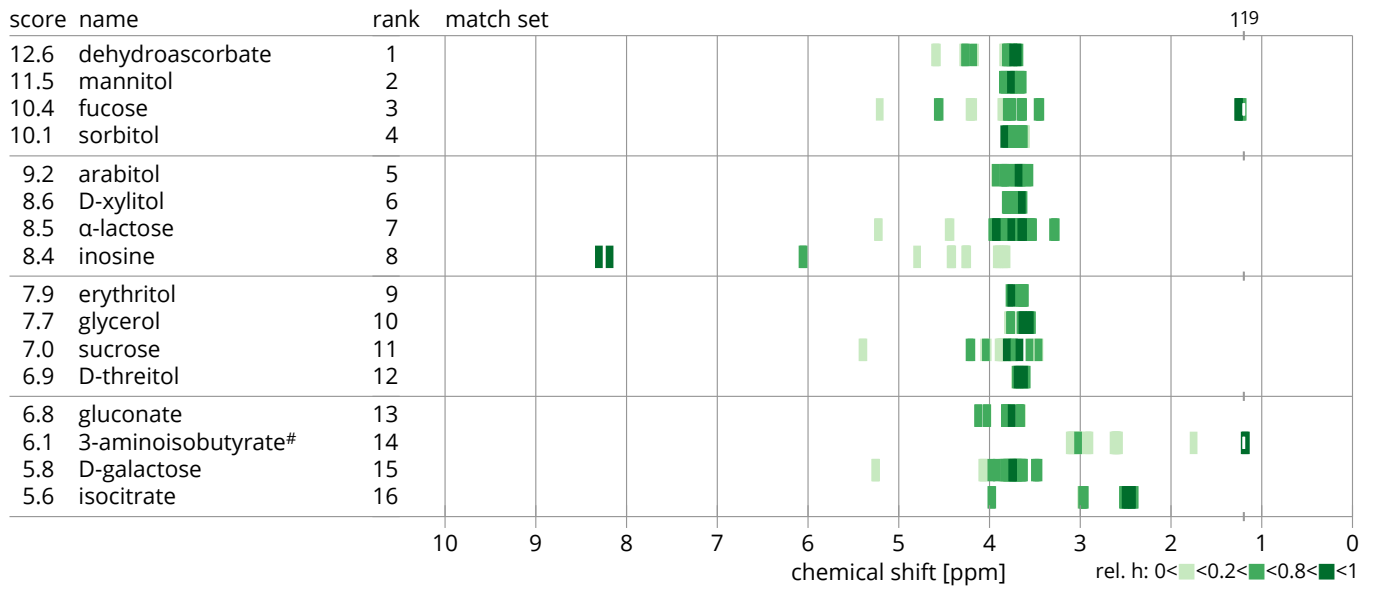

(B) Z-scoring metabomatching of SLC6A13 pseudospectrum.

### Metabomatching Settings

mode peak,  $\delta = 0.030$   
 scoring Z  
 database UMDB  
 decorr  $\lambda = 0.50$

### Pseudospectrum of rs10774021 in SLC6A13

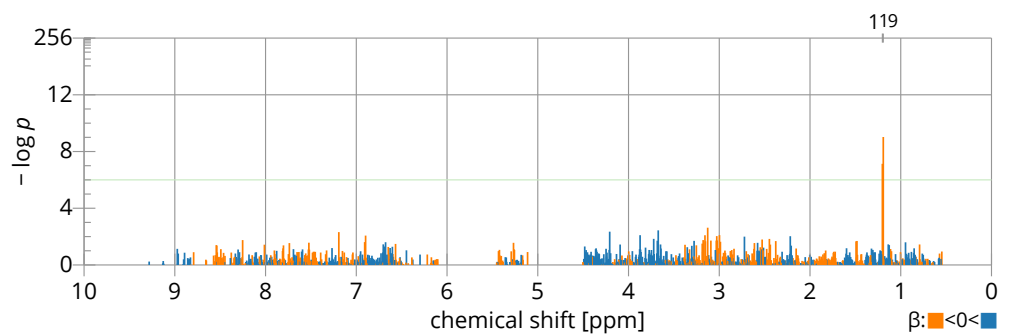

### Candidate Metabolites

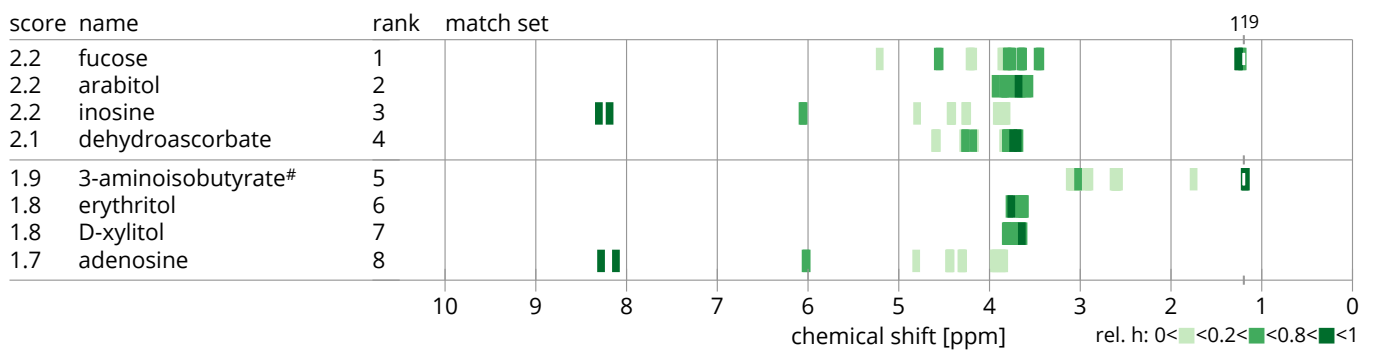

(C) Z-scoring metabomatching with decorrelation of SLC6A13 pseudospectrum.
